# Supplementary material for: Deep-learning-enabled brain hemodynamic mapping using resting-state fMRI
Source: PubMed Central journal article supplement (PMC10284915; doi:10.1038/s41746-023-00859-y), 2023-06-21
Supplement: 41746_2023_859_MOESM1_ESM.pdf [file 41746_2023_859_MOESM1_ESM.pdf]

## **Supplementary Information**

### **Deep-learning-enabled Brain Hemodynamic Mapping Using Resting-state fMRI**

Xirui Hou<sup>1,2</sup>, Pengfei Guo<sup>3</sup>, Puyang Wang<sup>4</sup>, Peiying Liu<sup>5</sup>, Doris D.M. Lin<sup>2</sup>, Hongli Fan<sup>1,2</sup>, Yang Li<sup>2</sup>, Zhiliang Wei<sup>2,6</sup>, Zixuan Lin<sup>2</sup>, Dengrong Jiang<sup>2</sup>, Jin Jin<sup>7</sup>, Catherine Kelly<sup>8</sup>, Jay J. Pillai<sup>2,9</sup>, Judy Huang<sup>9</sup>, Marco C. Pinho<sup>10</sup>, Binu P. Thomas<sup>10</sup>, Babu G. Welch<sup>11,12</sup>, Denise C. Park<sup>12</sup>, Vishal M. Patel<sup>3,4</sup>, Argye E. Hillis<sup>8</sup>, and Hanzhang Lu<sup>1,2,6\*</sup>

<sup>1</sup>Department of Biomedical Engineering, Johns Hopkins University School of Medicine, Baltimore, MD, USA

<sup>2</sup>The Russell H. Morgan Department of Radiology and Radiological Science, Johns Hopkins University School of Medicine, Baltimore, MD, USA

<sup>3</sup>Department of Computer Science, Johns Hopkins University, Baltimore, MD, USA

<sup>4</sup>Department of Electrical and Computer Engineering, Johns Hopkins University, Baltimore, MD, USA

<sup>5</sup>Department of Diagnostic Radiology and Nuclear Medicine, University of Maryland School of Medicine, Baltimore, MD, USA

<sup>6</sup>F.M. Kirby Research Center for Functional Brain Imaging, Kennedy Krieger Institute, Baltimore, MD, USA

<sup>7</sup>Department of Biostatistics, Johns Hopkins Bloomberg School of Public Health, Baltimore, MD, USA

<sup>8</sup>Department of Neurology, Johns Hopkins University School of Medicine, Baltimore, MD, USA

<sup>9</sup>Department of Neurosurgery, Johns Hopkins University School of Medicine, Baltimore, MD, USA

<sup>10</sup>Department of Radiology, UT Southwestern Medical Center, Dallas, TX, USA

<sup>11</sup>Department of Neurologic Surgery, UT Southwestern Medical Center, Dallas, TX, USA

<sup>12</sup>Center for Vital Longevity, School of Behavioral and Brain Sciences, University of Texas at Dallas, Dallas, TX, USA

**\*Correspondence:** Hanzhang Lu, Ph.D. The Russell H. Morgan Department of Radiology and Radiological Science, Johns Hopkins School of Medicine, 600 N. Wolfe Street, Baltimore, MD, USA, 21287, Email: [hanzhang.lu@jhu.edu](mailto:hanzhang.lu@jhu.edu)

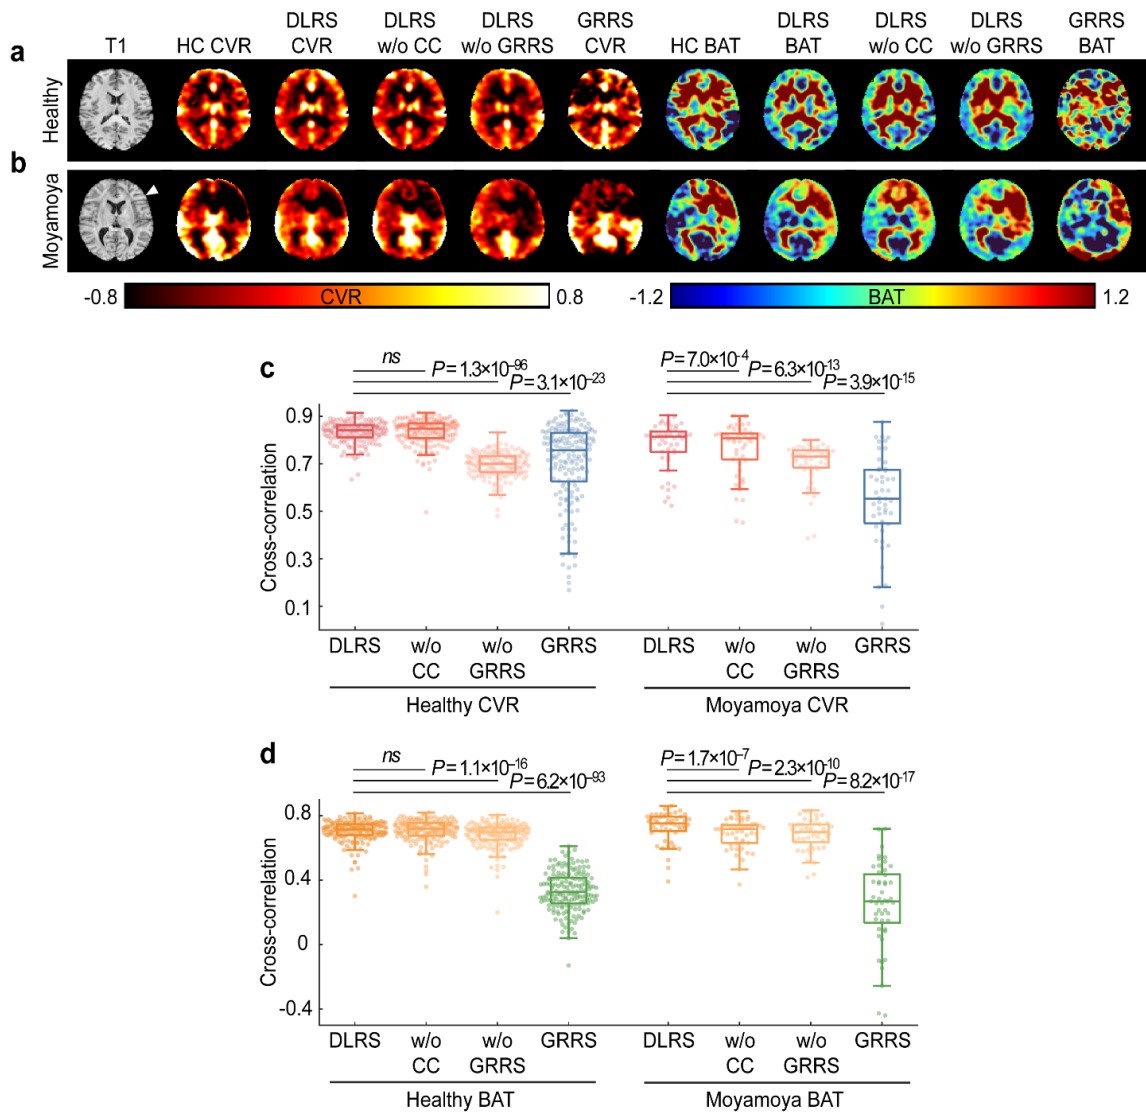

**Supplementary Figure 1 | Examples and quantitative metrics of the ablation study. a, b,** Representative cerebrovascular reactivity (CVR) and bolus arrival time (BAT) images of a healthy volunteer (**a**), and a Moyamoya disease patient (**b**). From left to right, the images are T1-weighted images, hypercapnic (HC) CVR, deep-learning resting-state (DLRS) CVR, DLRS CVR without cross-correlation inputs, DLRS CVR without global-regression inputs, global-regression resting-state (GRRS) CVR, HC BAT, DLRS BAT, DLRS BAT without cross-correlation inputs, DLRS BAT without GRRS inputs, and GRRS BAT. **c,** Boxplots denote Pearson cross-correlation between RS CVR images and HC CVR images in healthy and Moyamoya disease participants. The ablated parametric maps revealed a lower correlation with the reference HC maps. The line, box, and whiskers in the boxplots represent the median, the interquartile range (IQR), and 1.5 times the IQR, respectively. **d,** Boxplots denote Pearson cross-correlation between RS BAT images and HC BAT images.

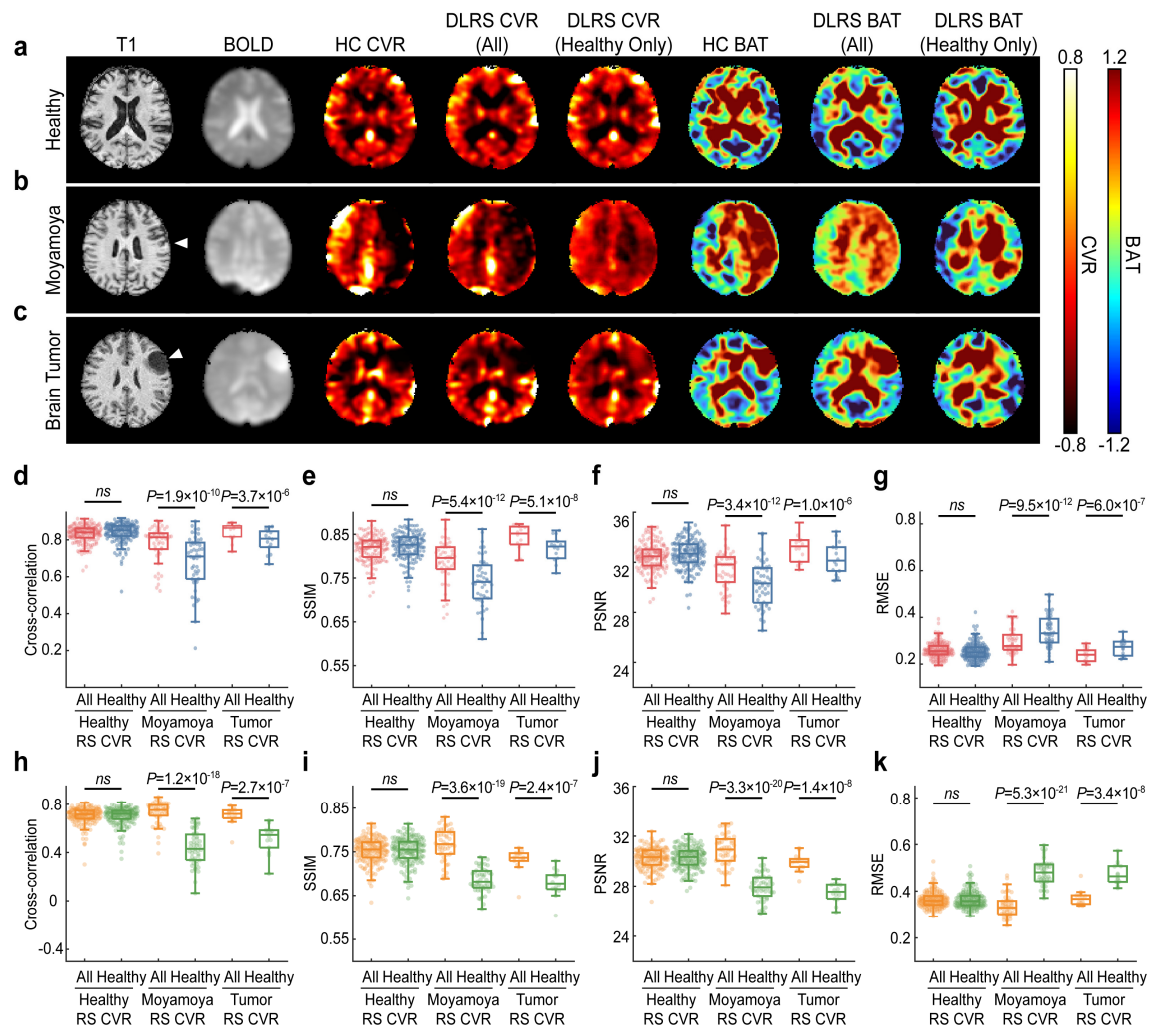

**Supplementary Figure 2 | The performance of deep-learning network trained exclusively on healthy group.** **a-c**, Representative cerebrovascular reactivity (CVR) and bolus arrival time (BAT) images of a healthy volunteer (a), Moyamoya disease patient (b), and brain tumor patient (c). From left to right, the images are T1-weighted images, raw BOLD images, hypercapnic (HC) CVR and BAT images, as well as deep-learning resting-state (DLRS) CVR and BAT images trained on all groups and healthy group. **d-g**, The boxplots display the similarity between deep-learning resting-state CVR maps and ground-truth HC CVR maps. Two types of resting-state CVR maps are studied: those trained on all groups and those specifically trained on the healthy group. Four similarity indices are studied, including Pearson cross-correlation (**d**), structure similarity index metric (SSIM) (**e**), peak signal-to-noise ratio (PSNR) (**f**), root-mean-square error (RMSE) (**g**). The line within the boxplots represents the median, the box represents the interquartile range (IQR), and the whiskers are 1.5 times the IQR. **h-k**, the boxplots display the similarity between deep-learning resting-state BAT maps and ground-truth HC BAT maps.

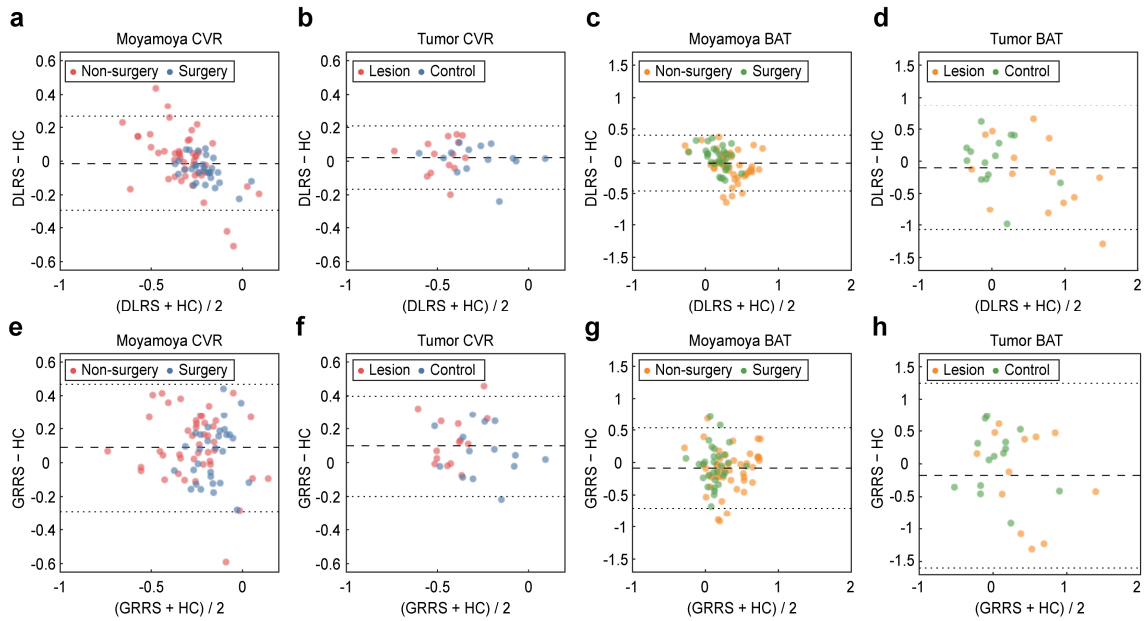

**Supplementary Figure 3 | Bland-Altman plots comparing the results of deep-learning resting-state (DLRS) and global-regression resting-state (GRRS) approaches to hypercapnic (HC) results. Top row: DLRS results. Bottom row: GRRS results. Left half: CVR results. Right half: BAT results.**

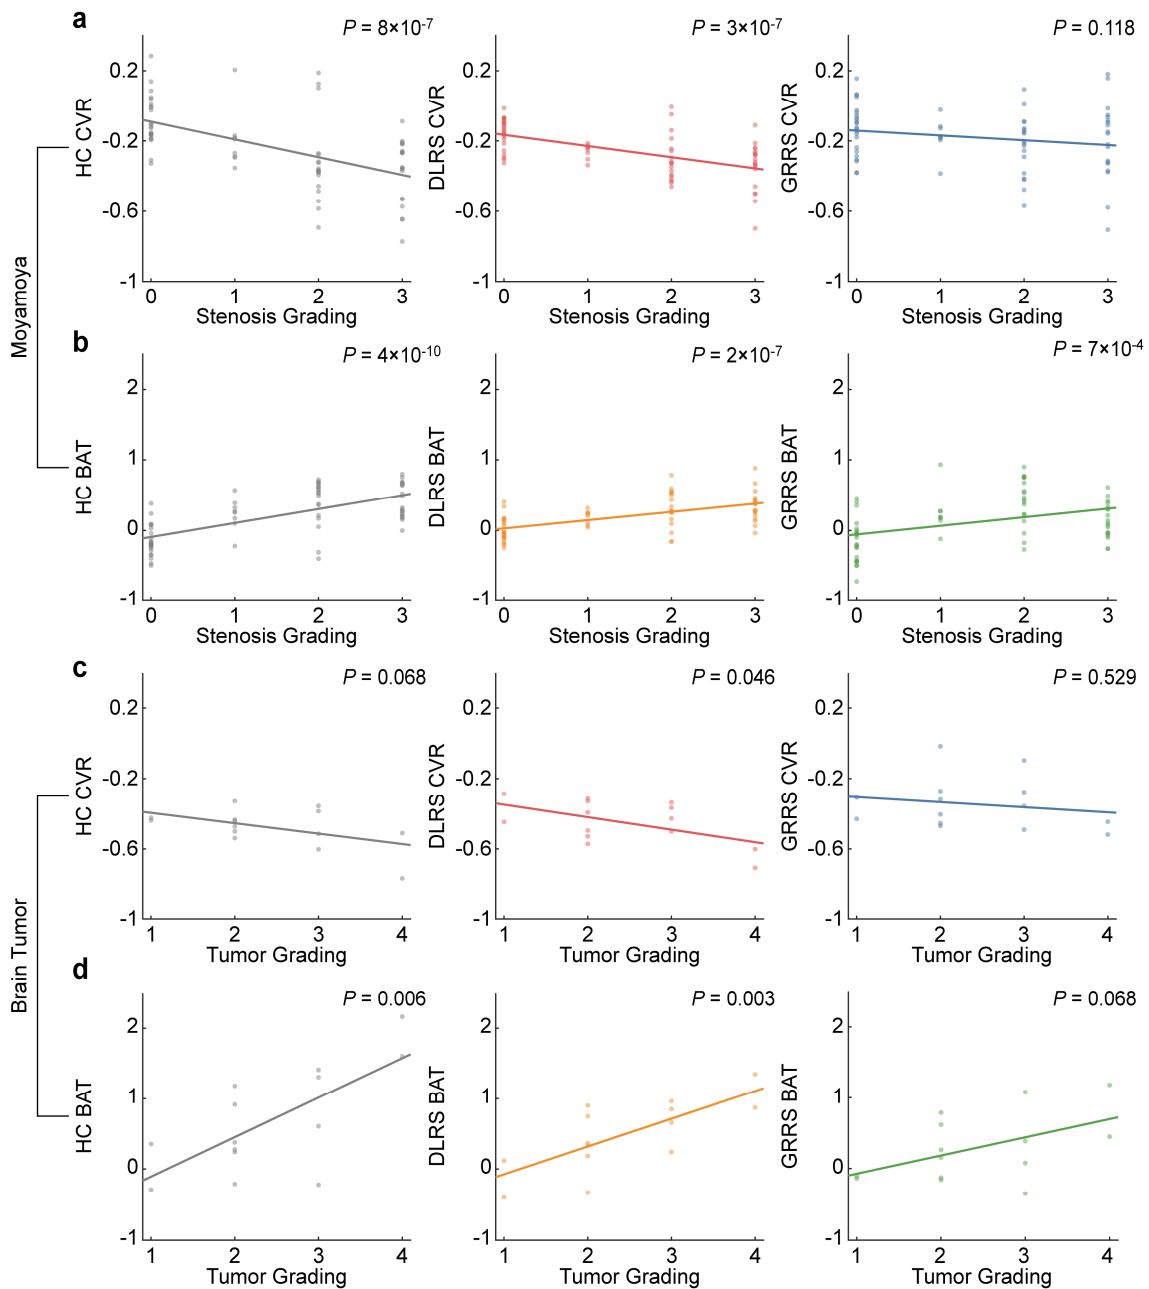

**Supplementary Figure 4 | Associations between cerebrovascular physiological maps and clinical variables.** **a**, Scatter plots between regional CVR and arterial stenosis grade in Moyamoya patients, as rated in the middle cerebral artery (MCA). Plots are shown for hypercapnic cerebrovascular reactivity (HC CVR, left), deep-learning resting-state (DLRS CVR, middle) and global-regression resting-state (GRRS CVR, right). More severe stenosis is associated with lower CVR. **b**, Scatter plot between BAT and arterial stenosis grade. More severe stenosis is associated with longer BAT. **c**, Scatter plots between regional CVR and WHO tumor grade. **d**, Scatter plots between regional BAT and WHO tumor grade.

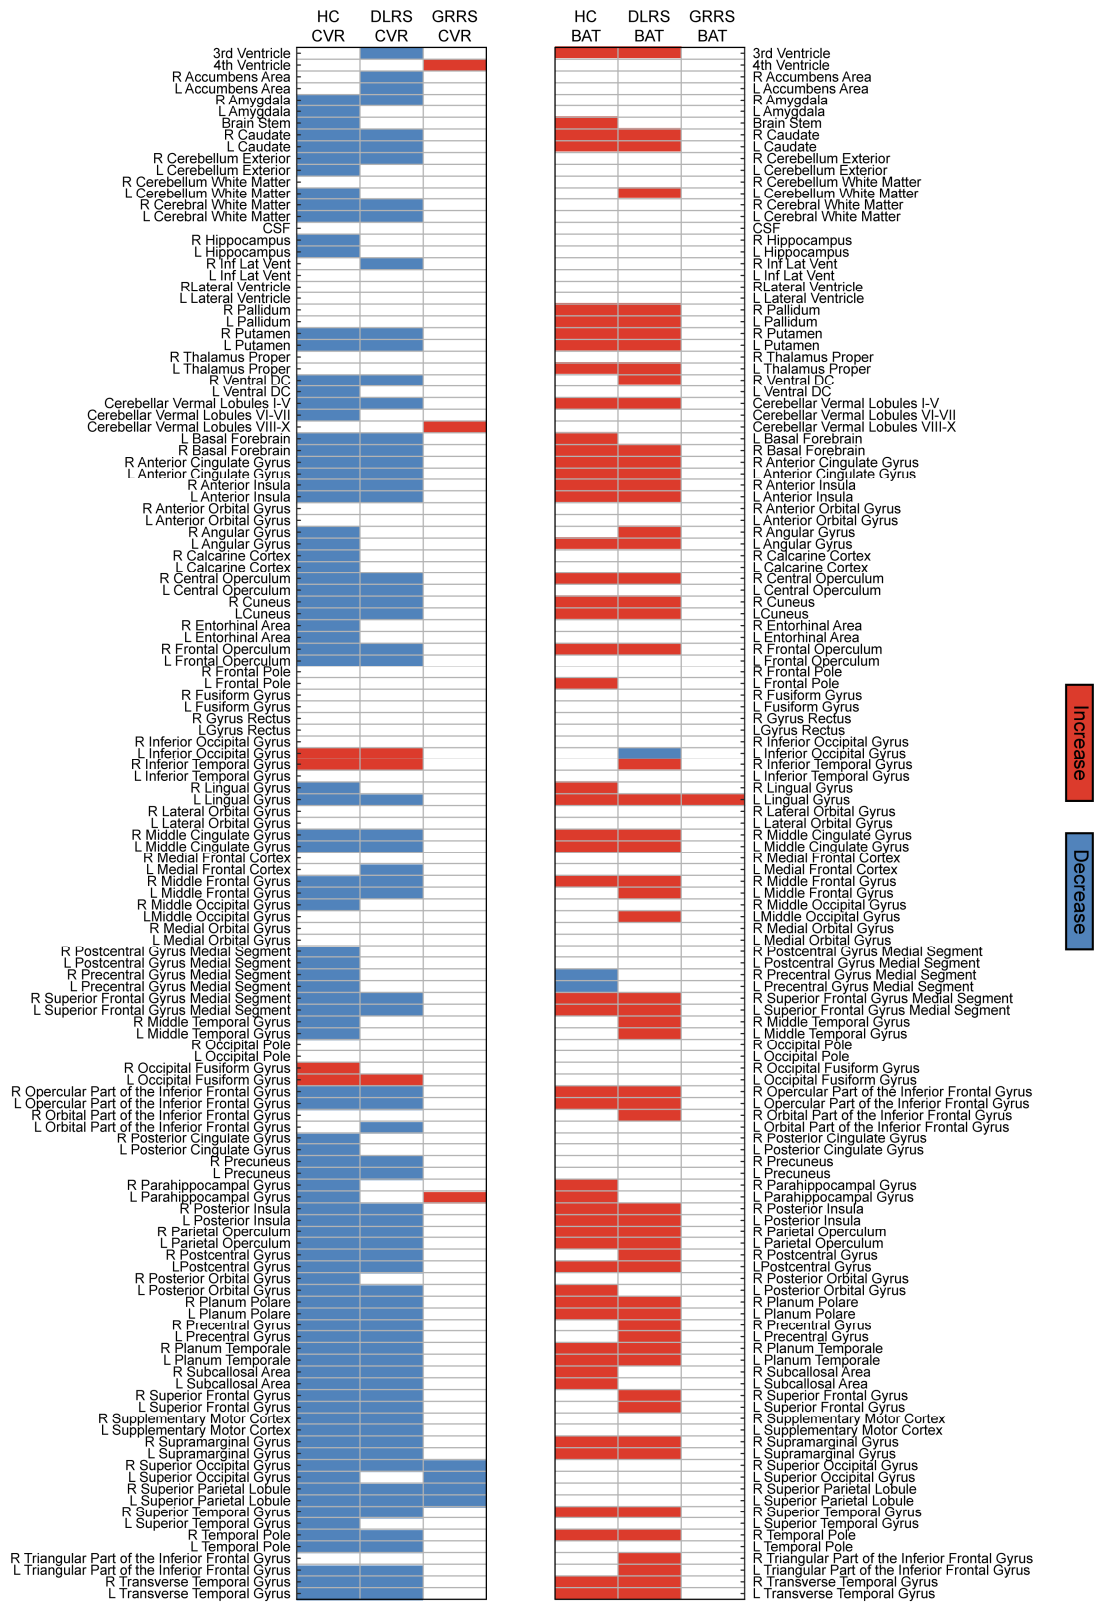

**Supplementary Figure 5 | Age-related differences in deep-learning resting-state cerebrovascular reactivity (DLRS CVR) and bolus arrival time (DLRS BAT) across the lifespan. From left to right, the heat maps represent the age differences associated with**

hypercapnic (HC) CVR, DLRS CVR, global-regression resting-state (GRRS) CVR, HC BAT, DLRS BAT and GRRS BAT. Cell color denotes model type: linear increasing (Red) and linear decreasing (Blue). All models are added gender as covariate and controlled the false discovery rate (FDR,  $q < 0.05$ ).

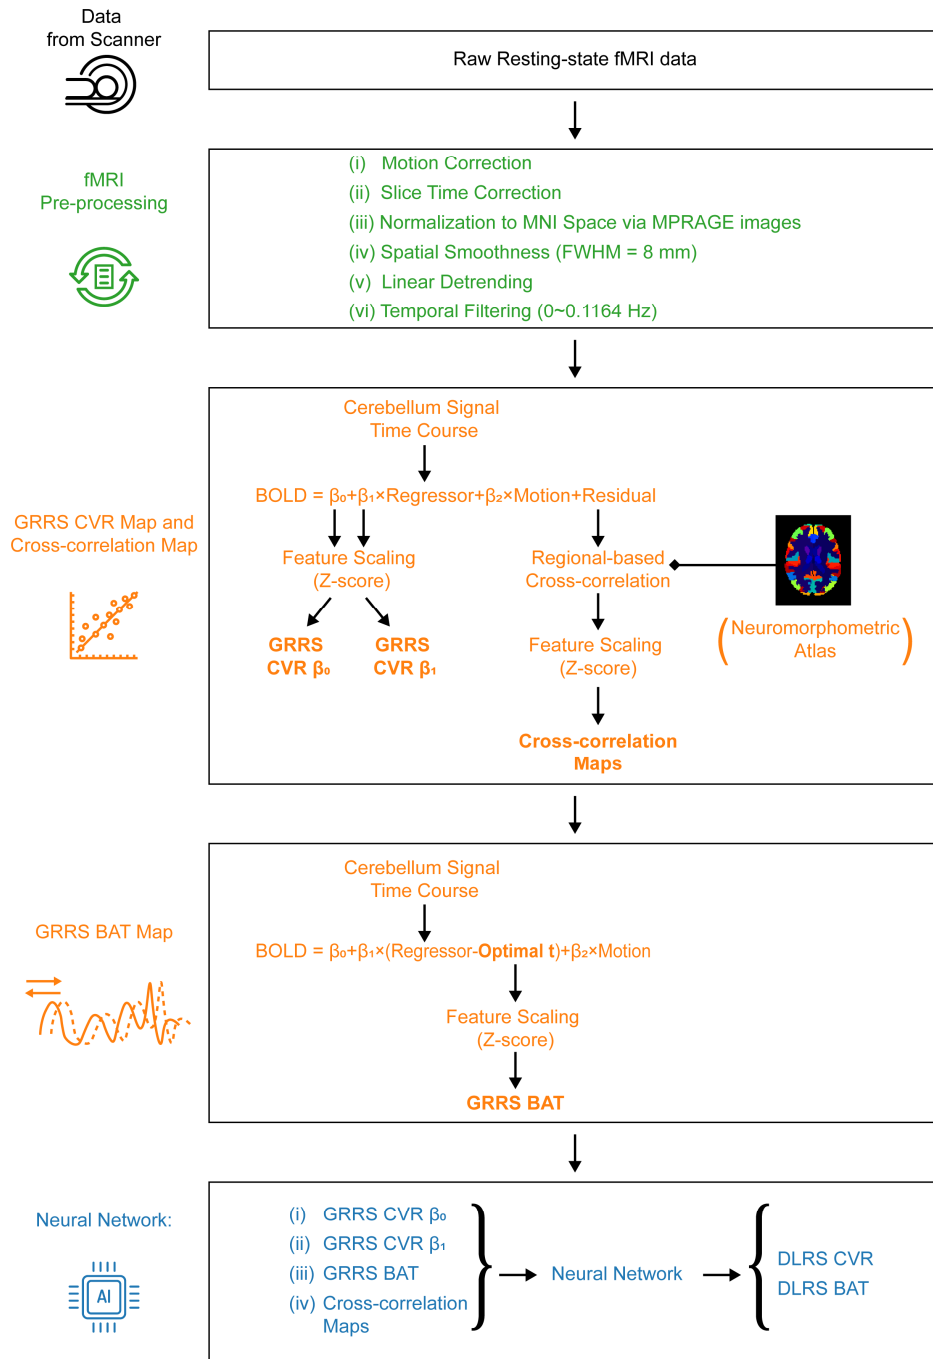

**Supplementary Figure 6 | Illustration of the analysis pipelines of deep-learning resting-state cerebrovascular reactivity (DLRS CVR) and bolus arrival time (DLRS BAT) using resting-state fMRI data.**



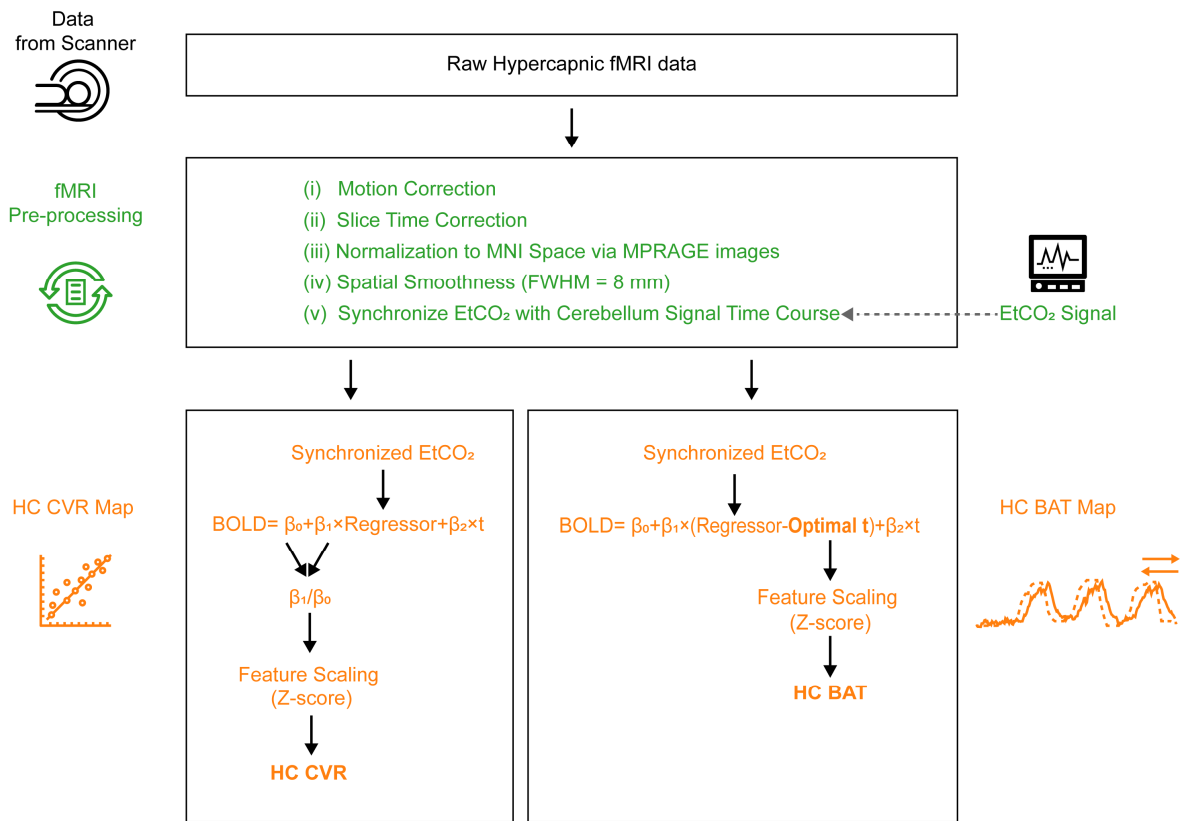

**Supplementary Figure 7 | Illustration of the analysis pipelines of hypercapnic cerebrovascular reactivity (HC CVR) and bolus arrival time (HC BAT).**

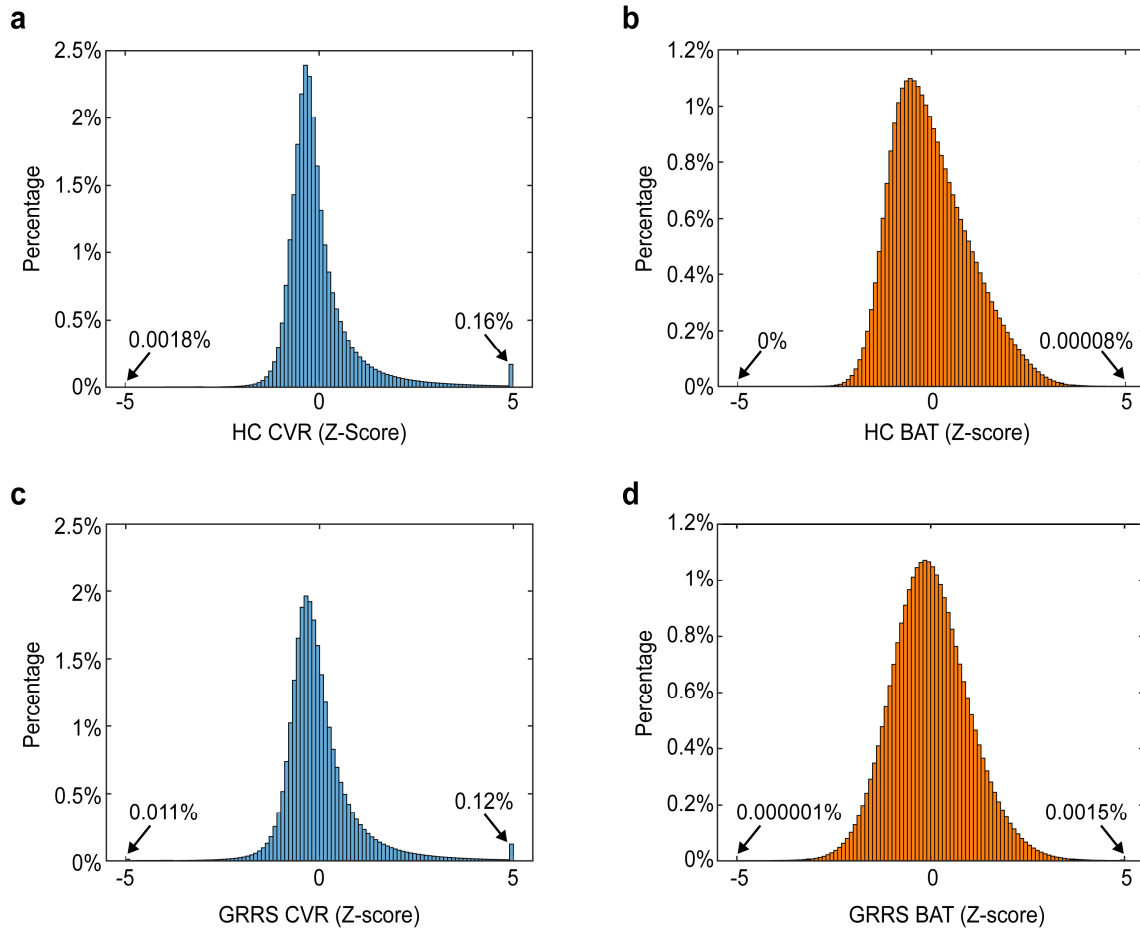

**Supplementary Figure 8 | Histograms of cerebrovascular reactivity (CVR) and bolus arrival time (BAT) after imaging clipping to a range of less than  $\pm 5$ .** **a**, Clipped distribution of hypercapnic (HC) CVR voxel-wise values after conversion to z-score. **b**, Clipped distribution of HC BAT voxel-wise values after conversion to z-score. **c**, Clipped distribution of global-regression resting-state (GRRS) CVR. **d**, Clipped distribution of GRRS BAT.

| Supplementary Table 1   Demographic and clinical data of Moyamoya patients. |             |     |                                          |       |       |       |       |       |       |       |
|-----------------------------------------------------------------------------|-------------|-----|------------------------------------------|-------|-------|-------|-------|-------|-------|-------|
| Subject number                                                              | Age (years) | Sex | MRA stenosis grade for cerebral arteries |       |       |       |       |       |       |       |
|                                                                             |             |     | R ICA                                    | L ICA | R MCA | L MCA | R ACA | L ACA | R PCA | L PCA |
| 1                                                                           | 18          | F   | 0                                        | 3     | 0     | 2     | 0     | 0     | 0     | 0     |
| 2                                                                           | 21          | F   | 1                                        | 0     | 1     | 0     | 0     | 0     | 0     | 0     |
| 3                                                                           | 24          | F   | 3                                        | 0     | 2     | 0     | 0     | 2     | 0     | 0     |
| 4                                                                           | 24          | F   | 3                                        | 1     | 3     | 3     | 0     | 0     | 0     | 0     |
| 5                                                                           | 24          | F   | 0                                        | 3     | 0     | 2     | 0     | 0     | 0     | 0     |
| 6                                                                           | 25          | F   | 0                                        | 1     | 0     | 2     | 0     | 0     | 0     | 0     |
| 7                                                                           | 30          | F   | 3                                        | 1     | 3     | 3     | 1     | 0     | 0     | 0     |
| 8                                                                           | 30          | F   | 1                                        | 3     | 2     | 3     | 1     | 2     | 0     | 0     |
| 9                                                                           | 30          | F   | 2                                        | 2     | 3     | 2     | 1     | 0     | 0     | 0     |
| 10                                                                          | 31          | M   | 3                                        | 2     | 3     | 3     | 2     | 1     | 0     | 0     |
| 11                                                                          | 32          | F   | 0                                        | 0     | 0     | 2     | 0     | 0     | 0     | 0     |
| 12                                                                          | 32          | M   | 2                                        | 2     | 2     | 2     | 2     | 2     | 0     | 0     |
| 13                                                                          | 34          | F   | 2                                        | 1     | 3     | 1     | 2     | 1     | 1     | 1     |
| 14                                                                          | 34          | F   | 3                                        | 3     | 3     | 3     | 1     | 2     | 0     | 0     |
| 15                                                                          | 35          | M   | 2                                        | 2     | 0     | 2     | 1     | 1     | 0     | 0     |
| 16                                                                          | 35          | F   | 0                                        | 3     | 0     | 3     | 0     | 0     | 0     | 0     |
| 17                                                                          | 36          | F   | 0                                        | 0     | 0     | 2     | 0     | 0     | 0     | 0     |
| 18                                                                          | 37          | F   | 0                                        | 0     | 0     | 2     | 0     | 0     | 0     | 0     |
| 19                                                                          | 38          | F   | 2                                        | 0     | 2     | 0     | 1     | 0     | 0     | 0     |
| 20                                                                          | 38          | M   | 1                                        | 1     | 3     | 2     | 0     | 1     | 0     | 0     |
| 21                                                                          | 38          | F   | 1                                        | 2     | 3     | 1     | 0     | 0     | 1     | 0     |
| 22                                                                          | 38          | F   | 0                                        | 2     | 0     | 3     | 0     | 1     | 0     | 0     |
| 23                                                                          | 38          | F   | 2                                        | 1     | 1     | 2     | 0     | 0     | 0     | 0     |
| 24                                                                          | 39          | F   | 2                                        | 3     | 2     | 3     | 2     | 1     | 1     | 2     |
| 25                                                                          | 39          | F   | 2                                        | 3     | 2     | 3     | 2     | 1     | 1     | 2     |
| 26                                                                          | 40          | F   | 2                                        | 3     | 2     | 3     | 2     | 1     | 1     | 2     |
| 27                                                                          | 41          | F   | 2                                        | 2     | 2     | 2     | 0     | 0     | 1     | 0     |
| 28                                                                          | 41          | F   | 2                                        | 2     | 0     | 2     | 0     | 2     | 0     | 0     |
| 29                                                                          | 42          | F   | 3                                        | 3     | 3     | 3     | 2     | 2     | 0     | 0     |
| 30                                                                          | 45          | F   | 2                                        | 0     | 1     | 0     | 0     | 0     | 0     | 0     |
| 31                                                                          | 45          | F   | 1                                        | 0     | 1     | 0     | 0     | 0     | 0     | 0     |
| 32                                                                          | 46          | M   | 3                                        | 3     | 3     | 0     | 0     | 0     | 1     | 0     |
| 33                                                                          | 46          | F   | 0                                        | 0     | 0     | 3     | 0     | 0     | 0     | 0     |
| 34                                                                          | 48          | F   | 0                                        | 3     | 0     | 2     | 2     | 1     | 0     | 0     |
| 35                                                                          | 49          | F   | 1                                        | 3     | 2     | 3     | 0     | 1     | 0     | 0     |
| 36                                                                          | 49          | F   | 2                                        | 2     | 2     | 3     | 0     | 2     | 0     | 0     |
| 37                                                                          | 50          | F   | 1                                        | 0     | 0     | 0     | 0     | 0     | 0     | 0     |
| 38                                                                          | 50          | F   | 2                                        | 1     | 1     | 3     | 0     | 2     | 0     | 0     |
| 39                                                                          | 50          | F   | 2                                        | 1     | 1     | 3     | 1     | 2     | 0     | 0     |
| 40                                                                          | 51          | F   | 3                                        | 3     | 2     | 3     | 1     | 2     | 0     | 0     |
| 41                                                                          | 51          | F   | 2                                        | 2     | 3     | 3     | 1     | 2     | 0     | 0     |
| 42                                                                          | 52          | F   | 3                                        | 3     | 3     | 3     | 2     | 0     | 0     | 0     |
| 43                                                                          | 52          | F   | 1                                        | 1     | 3     | 2     | 0     | 2     | 0     | 0     |
| 44                                                                          | 53          | M   | 0                                        | 2     | 0     | 3     | 2     | 0     | 0     | 0     |
| 45                                                                          | 60          | F   | 2                                        | 1     | 1     | 2     | 0     | 0     | 0     | 0     |
| 46                                                                          | 60          | F   | 2                                        | 1     | 1     | 3     | 0     | 1     | 0     | 0     |
| 47*                                                                         | 62          | F   | -                                        | -     | -     | -     | -     | -     | 0     | 0     |
| 48                                                                          | 64          | F   | 1                                        | 1     | 0     | 1     | 2     | 1     | 0     | 0     |
| 49                                                                          | 72          | F   | 1                                        | 1     | 0     | 3     | 2     | 0     | 1     | 0     |

\*In subject 47, the MR angiograph was positionned too high to grade the stenosis of some cerebral arteries.

Supplementary Table 1 | Demographic and clinical data of Moyamoya patients.

| <b>Supplementary Table 2   Demographic and clinical data of brain tumor patients.</b> |                    |            |                  |                        |
|---------------------------------------------------------------------------------------|--------------------|------------|------------------|------------------------|
| <b>Subject number</b>                                                                 | <b>Age (years)</b> | <b>Sex</b> | <b>WHO Grade</b> | <b>Histology</b>       |
| 1                                                                                     | 21                 | M          | 3                | Anaplastic astrocytoma |
| 2                                                                                     | 24                 | M          | 2                | Astrocytoma            |
| 3                                                                                     | 25                 | F          | 2                | Oligodendroglioma      |
| 4                                                                                     | 26                 | F          | 3                | Astrocytoma            |
| 5                                                                                     | 33                 | M          | 4                | Glioblastoma           |
| 6                                                                                     | 34                 | M          | 3                | Anaplastic glioma      |
| 7                                                                                     | 35                 | M          | 2                | Diffuse astrocytoma    |
| 8                                                                                     | 41                 | F          | 2                | Diffuse astrocytoma    |
| 9                                                                                     | 42                 | M          | 1                | Glioma                 |
| 10                                                                                    | 46                 | M          | 1                | Glioma                 |
| 11                                                                                    | 58                 | M          | 4                | Glioblastoma           |
| 12                                                                                    | 59                 | F          | 2                | Infiltrating glioma    |
| 13                                                                                    | 68                 | M          | 2                | Infiltrating glioma    |
| 14                                                                                    | 81                 | F          | 3                | Astrocytoma            |

**Supplementary Table 2 | Demographic and clinical data of brain tumor patients.**

| <b>Supplementary Table 3   Demographic and clinical data of stroke patients used for clinical test.</b> |                    |            |                                         |              |
|---------------------------------------------------------------------------------------------------------|--------------------|------------|-----------------------------------------|--------------|
| <b>Subject number</b>                                                                                   | <b>Age (years)</b> | <b>Sex</b> | <b>Time of scan post-stroke (Weeks)</b> | <b>NIHSS</b> |
| 1                                                                                                       | 27                 | F          | 0                                       | 3            |
| 2                                                                                                       | 28                 | F          | 51                                      | 4            |
| 3                                                                                                       | 33                 | F          | 22                                      | 11           |
| 4                                                                                                       | 36                 | M          | 9                                       | 6            |
| 5                                                                                                       | 39                 | F          | 31                                      |              |
| 6                                                                                                       | 39                 | F          | 1                                       | 2            |
| 7                                                                                                       | 40                 | M          | 49                                      | 1            |
| 8                                                                                                       | 46                 | M          | 2                                       | 1            |
| 9                                                                                                       | 46                 | F          | 32                                      | 9            |
| 10                                                                                                      | 47                 | M          | 1                                       | 0            |
| 11                                                                                                      | 49                 | M          | 52                                      | 0            |
| 12                                                                                                      | 50                 | M          | 1                                       | 1            |
| 13                                                                                                      | 50                 | M          | 12                                      | 1            |
| 14                                                                                                      | 52                 | M          | 0                                       | 1            |
| 15                                                                                                      | 54                 | F          | 0                                       | 11           |
| 16                                                                                                      | 54                 | F          | 20                                      | 3            |
| 17                                                                                                      | 54                 | M          | 59                                      | 2            |
| 18                                                                                                      | 56                 | M          | 56                                      | 2            |
| 19                                                                                                      | 56                 | M          | 24                                      | 2            |
| 20                                                                                                      | 57                 | F          | 24                                      | 1            |
| 21                                                                                                      | 57                 | M          | 10                                      | 2            |
| 22                                                                                                      | 57                 | F          | 0                                       | 2            |
| 23                                                                                                      | 59                 | M          | 2                                       | 1            |
| 24                                                                                                      | 60                 | F          | 4                                       | 5            |
| 25                                                                                                      | 60                 | M          | 52                                      | 4            |
| 26                                                                                                      | 60                 | M          | 30                                      | 23           |
| 27                                                                                                      | 61                 | F          | 63                                      | 3            |
| 28                                                                                                      | 61                 | M          | 64                                      | 5            |
| 29                                                                                                      | 62                 | M          | 16                                      | 6            |
| 30*                                                                                                     | 63                 | F          | 12                                      | -            |
| 31                                                                                                      | 63                 | M          | 7                                       | 0            |
| 32                                                                                                      | 64                 | M          | 0                                       | 2            |
| 33                                                                                                      | 65                 | M          | 0                                       | 1            |
| 34                                                                                                      | 66                 | M          | 0                                       | 2            |
| 35                                                                                                      | 71                 | F          | 11                                      | 2            |
| 36                                                                                                      | 74                 | M          | 17                                      | 5            |
| 37                                                                                                      | 76                 | M          | 0                                       | 2            |
| 38                                                                                                      | 87                 | F          | 0                                       | 10           |

\* In subject 30, the subject was referred for clinical research sub-acutely and not seen by neurologist.

**Supplementary Table 3 | Demographic and clinical data of stroke patients used for clinical test.**

| <b>Supplementary Table 4   Demographic and clinical data of stroke patients used for reproducibility test.</b> |                    |            |                                         |              |
|----------------------------------------------------------------------------------------------------------------|--------------------|------------|-----------------------------------------|--------------|
| <b>Subject number</b>                                                                                          | <b>Age (years)</b> | <b>Sex</b> | <b>Time of scan post-stroke (Weeks)</b> | <b>NIHSS</b> |
| 1                                                                                                              | 24                 | F          | 8                                       | 0            |
| 2                                                                                                              | 34                 | M          | 0                                       | 0            |
| 3                                                                                                              | 36                 | M          | 16                                      | 20           |
| 4                                                                                                              | 37                 | M          | 1                                       | 3            |
| 5                                                                                                              | 41                 | F          | 55                                      | 4            |
| 6                                                                                                              | 42                 | F          | 16                                      | 2            |
| 7                                                                                                              | 46                 | M          | 62                                      | 0            |
| 8                                                                                                              | 48                 | M          | 30                                      | 3            |
| 9                                                                                                              | 52                 | M          | 30                                      | 7            |
| 10                                                                                                             | 53                 | M          | 14                                      | 1            |
| 11                                                                                                             | 56                 | M          | 0                                       | 1            |
| 12                                                                                                             | 56                 | M          | 34                                      | 2            |
| 13                                                                                                             | 56                 | M          | 42                                      | 5            |
| 14                                                                                                             | 57                 | M          | 51                                      | 1            |
| 15                                                                                                             | 57                 | M          | 31                                      | 7            |
| 16                                                                                                             | 57                 | M          | 28                                      | 11           |
| 17                                                                                                             | 60                 | F          | 0                                       | 9            |
| 18                                                                                                             | 63                 | F          | 33                                      | 1            |
| 19                                                                                                             | 63                 | F          | 0                                       | 1            |
| 20                                                                                                             | 64                 | M          | 12                                      | 0            |
| 21                                                                                                             | 65                 | M          | 14                                      | 5            |
| 22                                                                                                             | 66                 | M          | 1                                       | 0            |
| 23                                                                                                             | 66                 | F          | 62                                      | 6            |
| 24                                                                                                             | 68                 | M          | 21                                      | 1            |
| 25                                                                                                             | 70                 | F          | 11                                      | 7            |
| 26                                                                                                             | 70                 | F          | 0                                       | 4            |
| 27                                                                                                             | 70                 | M          | 19                                      | 4            |
| 28                                                                                                             | 72                 | M          | 1                                       | 1            |
| 29                                                                                                             | 76                 | F          | 20                                      | 8            |
| 30                                                                                                             | 80                 | F          | 1                                       | 1            |

**Supplementary Table 4 | Demographic and clinical data of stroke patients used for reproducibility test.**

**Table S5. Architectural details of the deep-learning network used in this work.**

| Module                | Block   | Layer        | Input Layer | Input Size | Num of Filters | Kernel Size | Stride | Padding | Module      | Block          | Layer                | Input Layer          | Input Size | Num of Filters | Kernel Size | Stride | Padding |
|-----------------------|---------|--------------|-------------|------------|----------------|-------------|--------|---------|-------------|----------------|----------------------|----------------------|------------|----------------|-------------|--------|---------|
| Primary Encoder       | P_Conv1 | Conv+ReLU+BN | Images      | 3x96x112   | 64             | 3           | 1      | 1       | CVR Decoder | C_DeConv1      | Transpose Conv       | P_Conv5+S_Conv5      | 2048x6x7   | 512            | 2           | 2      | 0       |
|                       |         | Conv+ReLU+BN | Prev        | 64x96x112  | 64             | 3           | 1      | 1       |             |                | Concatenate          | P_Conv4+S_Conv4+Prev | 1536x12x14 | -              | -           | -      | -       |
|                       | P_Conv2 | MaxPool      | Prev        | 64x96x112  | 1              | 2           | 2      | 0       |             | Conv+ReLU+BN   | Prev                 | 512x12x14            | 512        | 3              | 1           | 1      | 1       |
|                       |         | Conv+ReLU+BN | Prev        | 64x48x56   | 128            | 3           | 1      | 1       |             | Transpose Conv | P_DeConv1            | 512x12x14            | 256        | 2              | 2           | 0      |         |
|                       | P_Conv3 | Conv+ReLU+BN | Prev        | 128x48x56  | 128            | 3           | 1      | 1       |             | Concatenate    | P_Conv2+S_Conv2+Prev | 768x24x28            | 256        | 3              | 1           | 1      | 1       |
|                       |         | MaxPool      | Prev        | 128x48x56  | 1              | 2           | 2      | 0       |             | Conv+ReLU+BN   | Prev                 | 256x24x28            | 256        | 3              | 1           | 1      | 1       |
|                       | P_Conv4 | Conv+ReLU+BN | Prev        | 256x24x28  | 256            | 3           | 1      | 1       |             | Transpose Conv | C_DeConv2            | 256x24x28            | 128        | 2              | 2           | 0      |         |
|                       |         | MaxPool      | Prev        | 256x24x28  | 1              | 2           | 2      | 0       |             | Concatenate    | P_Conv3+S_Conv3+Prev | 384x48x56            | 128        | 3              | 1           | 1      | 1       |
|                       | P_Conv5 | Conv+ReLU+BN | Prev        | 128x24x28  | 128            | 3           | 1      | 1       |             | Transpose Conv | C_DeConv3            | 128x48x56            | 64         | 2              | 2           | 0      |         |
|                       |         | MaxPool      | Prev        | 128x24x28  | 1              | 2           | 2      | 0       |             | Concatenate    | P_Conv4+S_Conv4+Prev | 192x96x112           | 64         | 3              | 1           | 1      | 1       |
| Supplementary Encoder | S_Conv1 | Conv+ReLU+BN | Images      | 133x96x112 | 64             | 3           | 1      | 1       | BAT Decoder | B_DeConv1      | Transpose Conv       | P_Conv5+S_Conv5      | 2048x6x7   | 512            | 2           | 2      | 0       |
|                       |         | Conv+ReLU+BN | Prev        | 64x96x112  | 64             | 3           | 1      | 1       |             |                | Concatenate          | P_Conv4+S_Conv4+Prev | 1536x12x14 | -              | -           | -      | -       |
|                       | S_Conv2 | MaxPool      | Prev        | 64x96x112  | 1              | 2           | 2      | 0       |             | Conv+ReLU+BN   | Prev                 | 512x12x14            | 512        | 3              | 1           | 1      | 1       |
|                       |         | Conv+ReLU+BN | Prev        | 64x48x56   | 128            | 3           | 1      | 1       |             | Transpose Conv | B_DeConv1            | 512x12x14            | 256        | 2              | 2           | 0      |         |
|                       | S_Conv3 | Conv+ReLU+BN | Prev        | 128x48x56  | 128            | 3           | 1      | 1       |             | Concatenate    | P_Conv2+S_Conv2+Prev | 768x24x28            | 256        | 3              | 1           | 1      | 1       |
|                       |         | MaxPool      | Prev        | 128x48x56  | 1              | 2           | 2      | 0       |             | Conv+ReLU+BN   | Prev                 | 256x24x28            | 256        | 3              | 1           | 1      | 1       |
|                       | S_Conv4 | Conv+ReLU+BN | Prev        | 256x24x28  | 256            | 3           | 1      | 1       |             | Transpose Conv | B_DeConv2            | 256x24x28            | 128        | 2              | 2           | 0      |         |
|                       |         | MaxPool      | Prev        | 256x24x28  | 1              | 2           | 2      | 0       |             | Concatenate    | P_Conv3+S_Conv3+Prev | 384x48x56            | 128        | 3              | 1           | 1      | 1       |
|                       | S_Conv5 | Conv+ReLU+BN | Prev        | 128x24x28  | 128            | 3           | 1      | 1       |             | Transpose Conv | B_DeConv3            | 128x48x56            | 64         | 2              | 2           | 0      |         |
|                       |         | MaxPool      | Prev        | 128x24x28  | 1              | 2           | 2      | 0       |             | Concatenate    | P_Conv4+S_Conv4+Prev | 192x96x112           | 64         | 3              | 1           | 1      | 1       |

Conv: Convolution, ReLU: Rectified linear unit, BN: Batch normalization, Tanh: Hyperbolic tangent, Prev: Previous layer output.

**Supplementary Table 5 | Architectural details of the deep-learning network used in this work.**
